# Supplementary material for: The enhancement of the catalytic performance of CrOx/Al2O3 catalysts for ethylbenzene dehydrogenation through tailored coke deposition
Source: Royal Society of Chemistry journal article supplement (doi:10.1039/c5cy01157d), 2015-09-16
Supplement: c5cy01157d1.pdf [file c5cy01157d1.pdf]

## The enhancement of the catalytic performance of $\text{CrO}_x/\text{Al}_2\text{O}_3$ catalysts for ethylbenzene dehydrogenation through tailored coke deposition

Sara Gomez <sup>a</sup>, Liam McMillan <sup>a</sup>, James McGregor <sup>a,b\*</sup>, J. Axel Zeitler <sup>a</sup>, Nabil Al-Yassir <sup>c</sup>, Sulaiman Al-Khattaf <sup>c</sup>, Lynn F. Gladden <sup>a</sup>

<sup>a</sup> University of Cambridge, Department of Chemical Engineering and Biotechnology, Cambridge CB2 3RA, UK

<sup>b</sup> present address: University of Sheffield, Department of Chemical and Biological Engineering, Sheffield S1 3JD, UK

<sup>c</sup> King Fahd University of Petroleum & Minerals, Dhahran 31261, Saudi Arabia

\*e-mail: james.mcgregor@sheffield.ac.uk

### Supplementary Information

Table S1. Position of the Raman bands, D1/G and D1/D3 ratios of pre-coked  $\text{CrO}_x/\text{Al}_2\text{O}_3$  with benzene, toluene, styrene and ethylene at 600 °C for 6 h time-on-stream.

Fig. S1. Cr 2p XP spectrum of a) fresh  $\text{CrO}_x/\text{Al}_2\text{O}_3$  and b)  $\text{CrO}_x/\text{Al}_2\text{O}_3$  pre-coked with benzene. Reference fitting values were utilized for Cr(III). The fresh catalyst shows the satellite peak ( $2p_{3/2}$  sat.) at 591 eV.

**Table S1.** Position of the Raman bands, D1/G and D1/D3 ratios of pre-coked CrO<sub>x</sub>/Al<sub>2</sub>O<sub>3</sub> with benzene, toluene, styrene and ethylene at 600 °C for 6 h time-on-stream.

|                         |                              | <b>CrO<sub>x</sub>/Al<sub>2</sub>O<sub>3</sub> pre-coked with:</b> |                |                |                 |
|-------------------------|------------------------------|--------------------------------------------------------------------|----------------|----------------|-----------------|
|                         |                              | <b>benzene</b>                                                     | <b>toluene</b> | <b>styrene</b> | <b>ethylene</b> |
| <b>D4</b>               | position (cm <sup>-1</sup> ) | 1208                                                               | 1211           | 1214           | 1202            |
|                         | FWHM (cm <sup>-1</sup> )     | 51                                                                 | 112            | 122            | 93              |
| <b>D1</b>               | position (cm <sup>-1</sup> ) | 1303                                                               | 1319           | 1322           | 1335            |
|                         | FWHM (cm <sup>-1</sup> )     | 126                                                                | 163            | 166            | 151             |
| <b>D3</b>               | position (cm <sup>-1</sup> ) | 1491                                                               | 1500           | 1500           | 1501            |
|                         | FWHM (cm <sup>-1</sup> )     | 229                                                                | 244            | 238            | 292             |
| <b>G</b>                | position (cm <sup>-1</sup> ) | 1599                                                               | 1593           | 1596           | 1592            |
|                         | FWHM (cm <sup>-1</sup> )     | 57                                                                 | 68             | 69             | 51              |
| <b>Intensity ratios</b> |                              |                                                                    |                |                |                 |
| <b>D1/G</b>             |                              | 2.7 ± 0.1                                                          | 2.8 ± 0.1      | 3.1 ± 0.2      | 4.5 ± 0.2       |
| <b>D1/D3</b>            |                              | 4.0 ± 0.2                                                          | 2.3 ± 0.1      | 2.2 ± 0.1      | 1.9 ± 0.1       |

**Fig. S1.** Cr 2p XP spectrum of a) fresh  $\text{CrO}_x/\text{Al}_2\text{O}_3$  and b)  $\text{CrO}_x/\text{Al}_2\text{O}_3$  pre-coked with benzene. Reference fitting values were utilized for Cr(III). The fresh catalyst shows the satellite peak ( $2p_{3/2}$  sat.) at 591 eV.
